# Supplementary material for: Electron tunneling through molecule–electrode contacts of single alkane molecular junctions: experimental determination and a practical barrier model
Source: Royal Society of Chemistry journal article supplement (doi:10.1039/c5cp07945d), 2016-01-01
Supplement: c5cp07945d1.pdf [file c5cp07945d1.pdf]

## Electronic Supplementary Information (ESI)

### Electron tunneling through molecule-electrode contacts of single alkane molecular junctions: experimental determination and a practical barrier model

Kun Wang and Bingqian Xu\*

Single Molecule Study Laboratory, Faculty of Engineering and Nanoscale Science  
and Engineering Center, University of Georgia, Athens, Georgia 30602, USA

\* Email: bxu@engr.uga.edu

#### SI-1 Example conductance traces

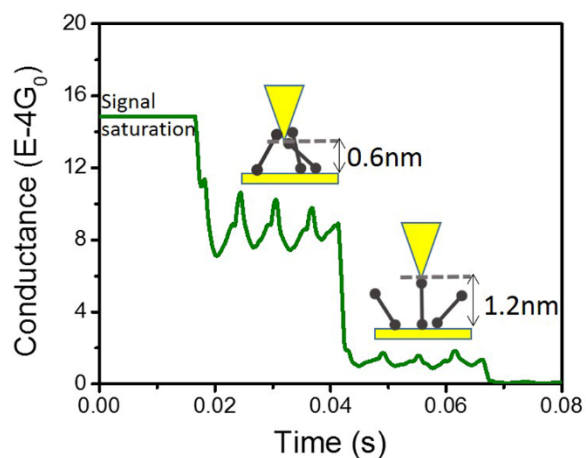

**Fig. S1** Example case of a full-scale modulated conductance trace.

Note that as shown in Fig. S1, , the single-molecule plateaus of C8DT and C8DA in our measurements mostly appeared under the junction separation of  $\sim 1.2$ nm which was created by twice the abrupt stretching of 0.6nm. For this case, the distance between the electrodes is about the C8 molecular length. Thus, the molecule should stand still nearly perpendicular to the

substrate. This setup greatly diminished the influence of the conductance change caused by molecular angle tilt when the mechanical modulation was applied.

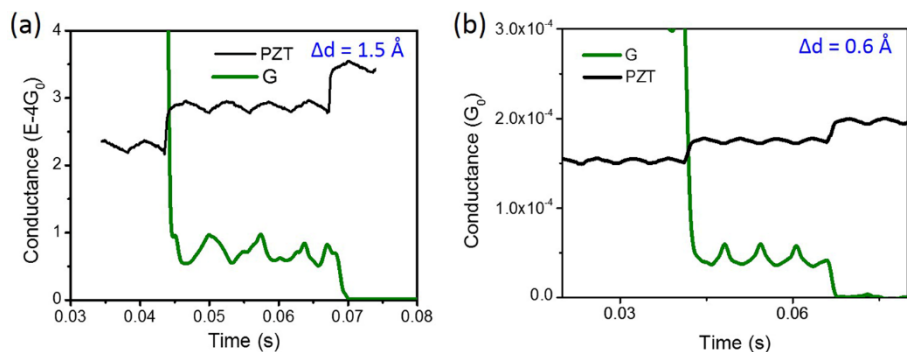

**Fig. S2** Typical modulated C8DT conductance traces and corresponding PZT signals for  $\Delta d=1.5\text{\AA}$  (a) and  $\Delta d=0.6\text{\AA}$

(b).

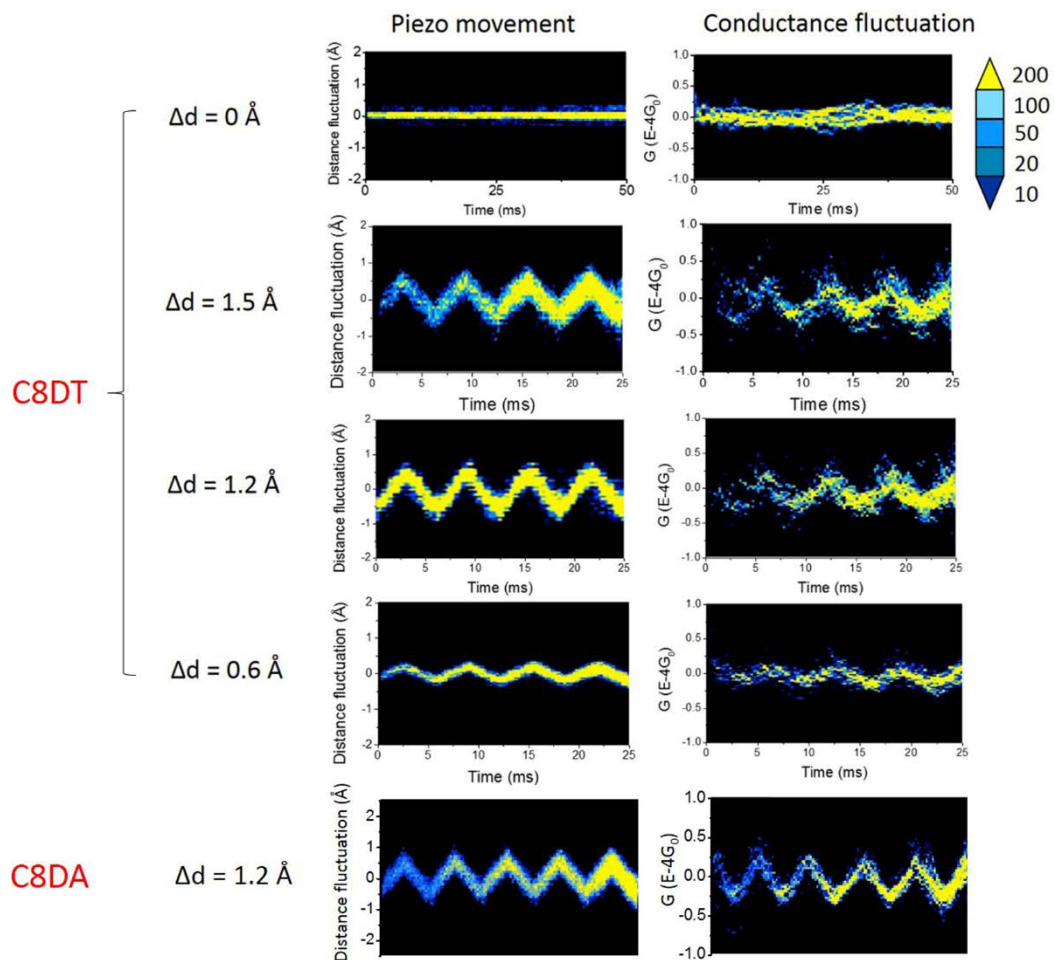

**Fig. S3** Two-dimensional (2D) illustration of the overlay of piezo signal and conductance signal of around 70~80 conductance plateaus for C8DT and C8DA at each modulation amplitude with regular conductance fluctuation.

Note that in Fig. S3, the conductance plateaus for each modulation amplitude has been offset to zero by deducting a value of  $6.5E-5G_0$  for C8DT and  $4E-5G_0$  for C8DA which is the average value of all the conductance plateaus under the TRI modulation. By doing so, we aim to show the change in degree of conductance fluctuation that corresponds to different modulation amplitudes. It can be clearly seen that the degree of conductance fluctuation increases with the increase of modulation amplitude. We emphasize that the regular conductance fluctuation only occurred when the TRI mechanical modulation was applied. This proves that this regular conductance change was predominantly caused by the junction separation regulation instead of other factors like thermal vibration or mechanical noise. We also notice that the noise level for modulated conductance plateaus ( $\sim 1E-5G_0$ ) is smaller than that of non-modulated plateaus ( $\sim 2E-5G_0$ ).

## **SI-2. Conductance switching examples and switching probability distribution under different modulation amplitudes**

Using stretch-hold mode STM break junction technique, four single-molecule conductance sets have been observed.<sup>1</sup> Under the TRI modulations, we observed evident conductance switching among the different conductance sets (Figure S4a and S4b), and that the switching probability increased with the increase of modulation amplitude (Figure S4c).

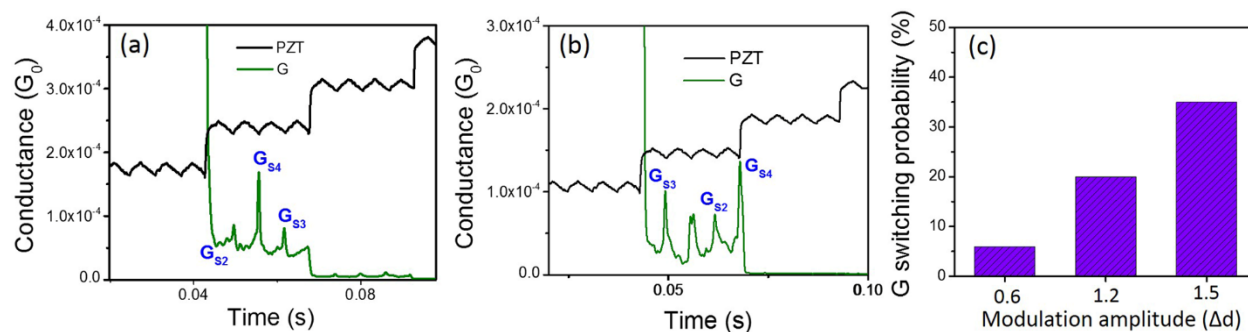

**Fig. S4.** Example conductance traces containing conductance switching events among different single-molecule conductance sets (a and b) under  $\Delta d = 1.5\text{\AA}$  and the switching probability under three modulation amplitudes (c).

### SI-3 Two-dimensional (2D) $\beta_C$ vs $\Delta d$ and $\Phi_C$ vs $\Delta d$ plots

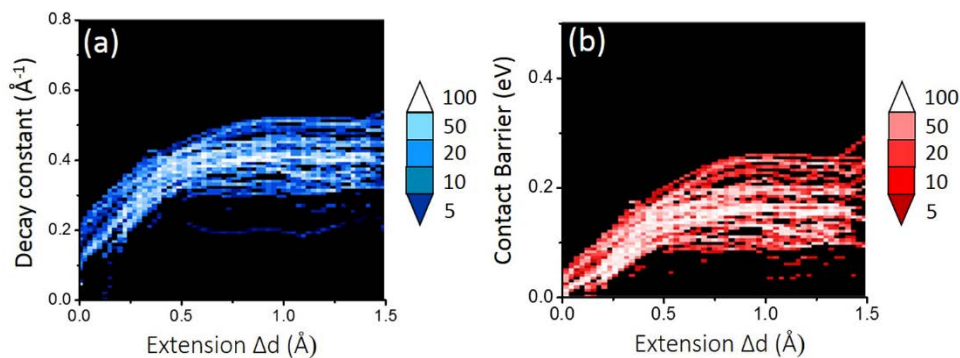

**Fig. S5** C8DT two-dimensional (2D) contact decay constant  $\beta_C$  vs extension  $\Delta d$  (a) and contact tunneling barrier  $\Phi_C$  vs extension  $\Delta d$  (b) plot of around 100 conductance decrease regions.

### SI-4. Linear fitting of the contact barrier data

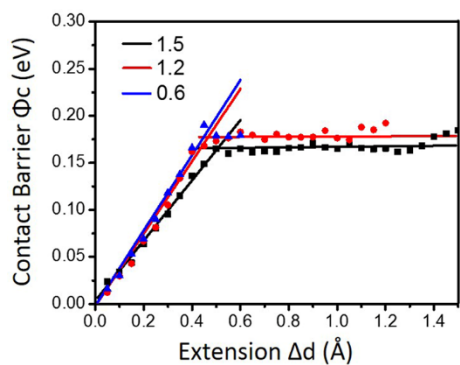

**Fig. S6.** The linear fitting of the contact barrier data shown in Fig. 2a in the main text.

### SI-5. Distribution of experimental $G_{mol}$ and distribution of conductance decrease

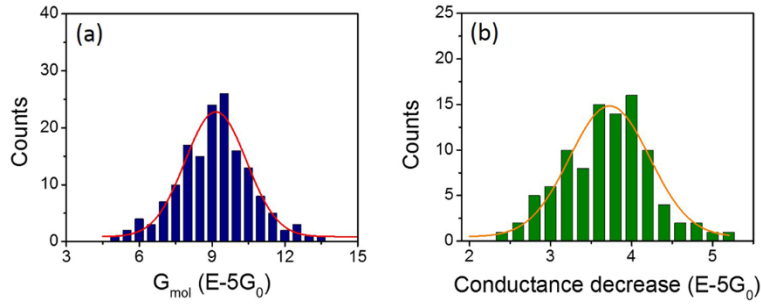

**Fig. S7.** (a)  $G_{mol}$  histogram of 158 conductance decrease events which contain no conductance switching under  $\Delta d = 1.5\text{\AA}$ . (b) The distribution of conductance decrease of 68 experimental curves initiated from experimental  $G_{mol}$  within range of  $9(\pm 1) \times 10^{-5}G_0$ .

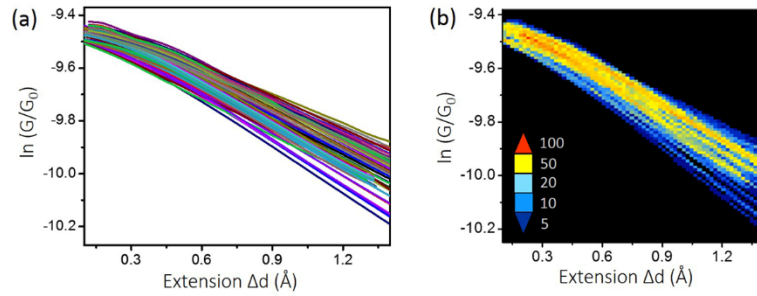

**Fig. S8** The raw experimental data of  $\ln G$  vs  $\Delta d$  plot (a) and the 2D illustration of  $\ln G$  vs  $\Delta d$  plot (b) over 68 conductance decrease curves that have a  $G_{mol}$  of  $9(\pm 1)E-5G_0$ .

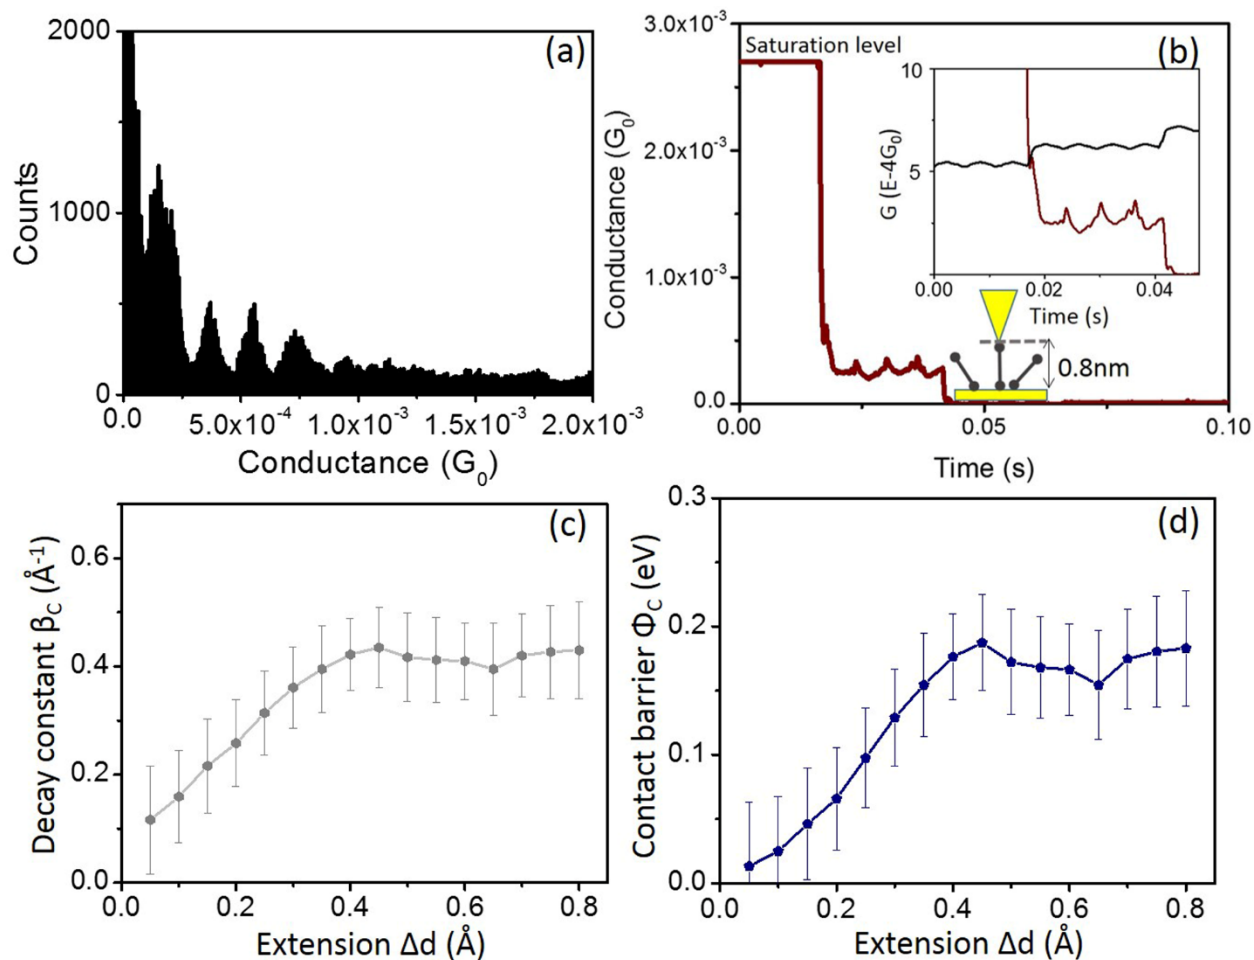

**Fig. S9** (a) Stretch-hold mode conductance histogram of C6DT measured under 0.3V. Note that only the conductance plateaus within the first peak range ( $1.5 \sim 2.5 \times 10^{-3} G_0$ ) of the histogram were used for further statistical analysis. (b) Typical full-scale modulated C6DT conductance trace. The inset shows a magnified view of the conductance plateau region. Note that the conductance plateau appeared after one abrupt stretching of 0.8nm. (c) and (d) show the C6DT contact decay constant  $\beta_C$  vs extension distance  $\Delta d$  plot and contact barrier height  $\Phi_C$  vs extension distance  $\Delta d$  plot, respectively, based on around 100 conductance decrease events,

## References

1. J. Zhou, F. Chen and B. Xu, *J. Am. Chem. Soc.*, 2009, **131**, 10439-10446.
